# Supplementary material
Source: PubMed Central journal article supplement (PMC7640744)
Supplement: Supp_Fig1.pdf [file Supp_Fig1.pdf]

## Supplementary Data

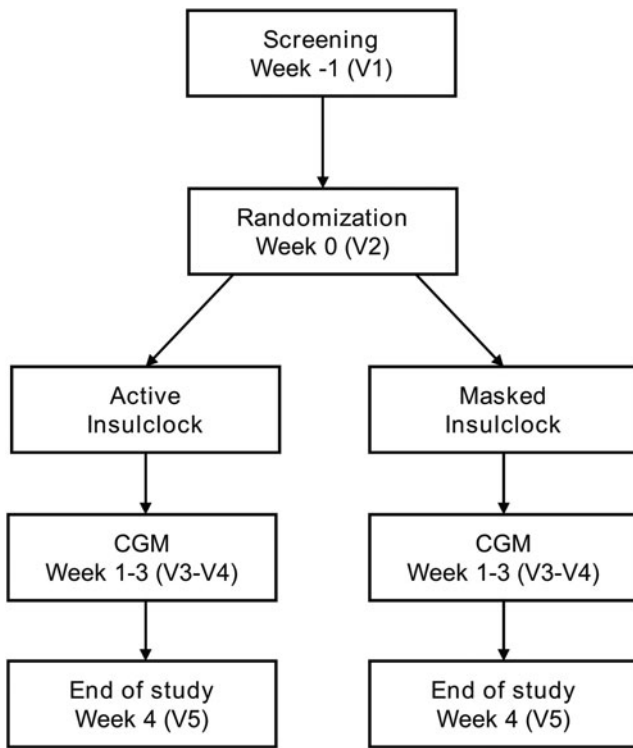

**SUPPLEMENTARY FIG. S1.** Flowchart showing the study design. CGM, continuous glucose monitoring.
