# Supplementary material
Source: PubMed Central journal article supplement (PMC7640744)
Supplement: Supp_Fig2.pdf [file Supp_Fig2.pdf]

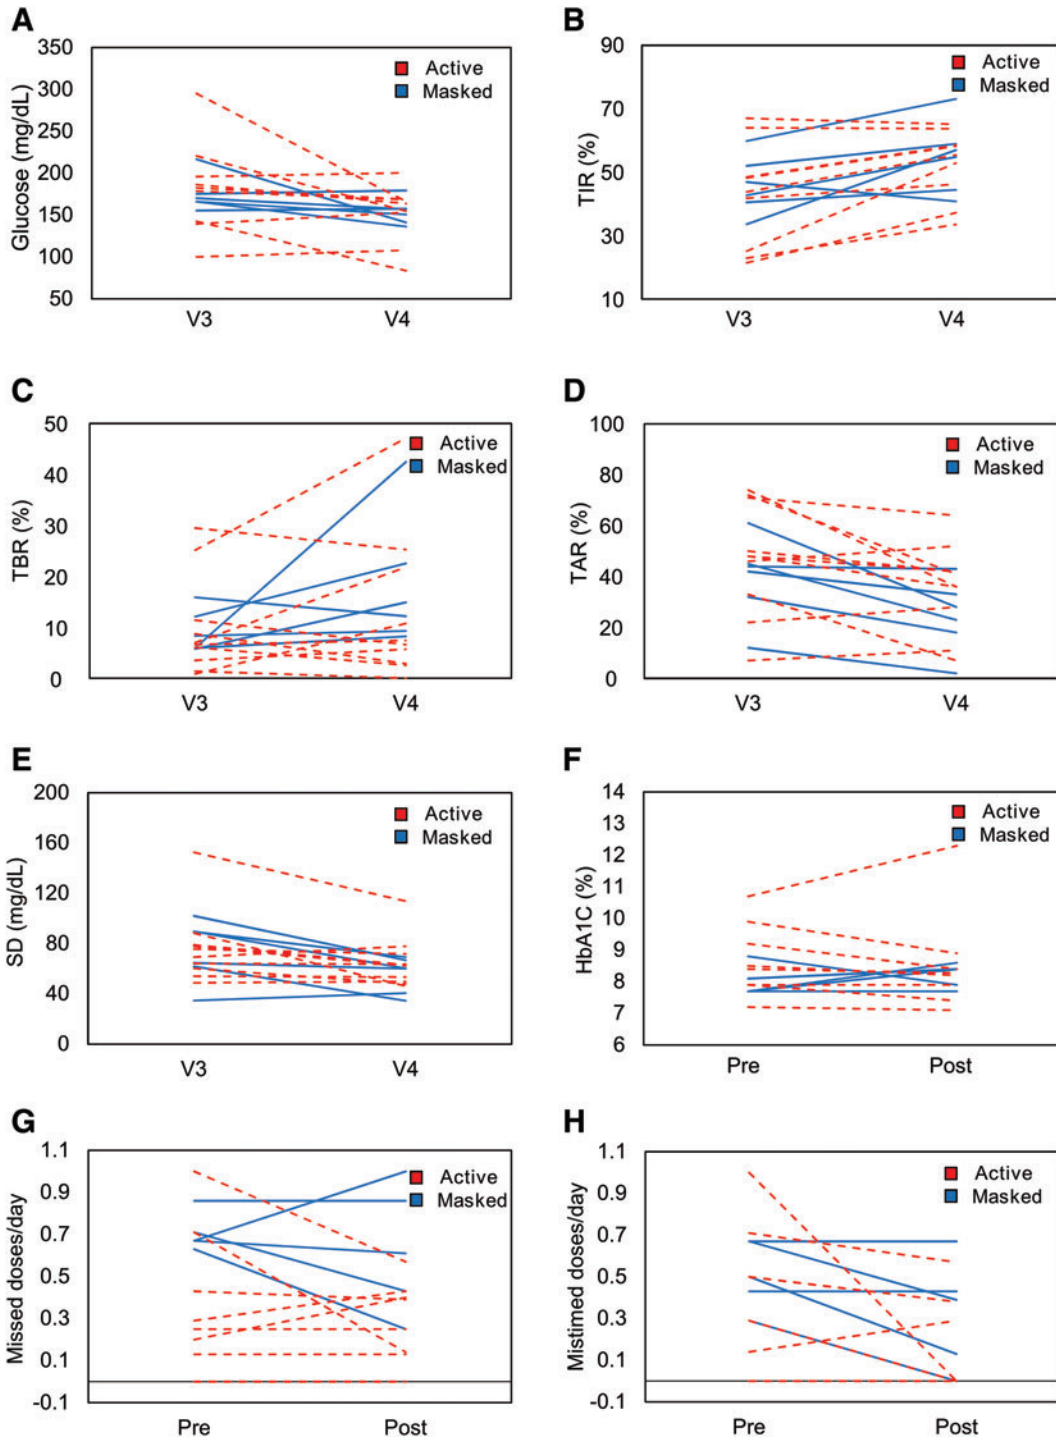

**SUPPLEMENTARY FIG. S2.** Effect of *Insulclock*<sup>®</sup> on individual trends. Line graphs show individual trends for (A) glucose, (B) TIR, (C) TBR, (D) TAR, and (E) SD at Visit 3 (V3) and Visit 4 (V4), and (F) HbA1C, (G) missed and (H) mistimed insulin doses at baseline (pre) and Visit 5 (post). SD, standard deviation; TAR, time above range; TBR, time below range; TIR, time in range.
