# Supplementary material
Source: PubMed Central journal article supplement (PMC7640744)
Supplement: Supp_Fig3.pdf [file Supp_Fig3.pdf]

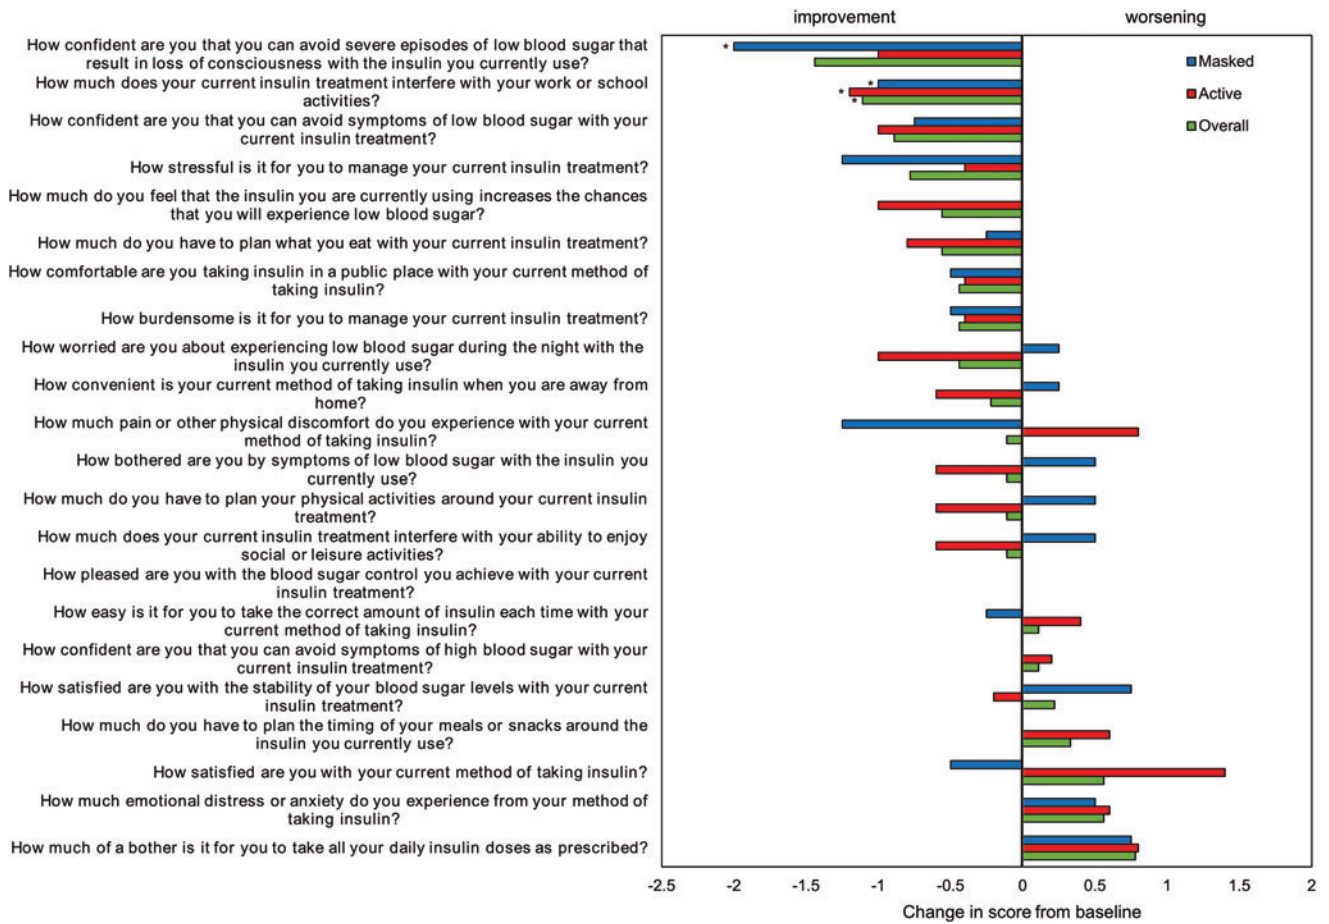

**SUPPLEMENTARY FIG. S3.** Effect of *Insulclock* on treatment satisfaction. The bar graphs show the change in mean scores for each item of the ITSQ from baseline to Visit 5. \* $P < 0.05$  from baseline (Student's  $t$ -test). ITSQ, Insulin Treatment Satisfaction Questionnaire.
